# Supplementary material
Source: MDPI journal article supplement (https://www.mdpi.com/2072-4292/15/3/732)
Supplement: s1 [file s1]

# Stability Analysis of the Volcanic Cave El Mirador (Galápagos Islands, Ecuador) Combining Numerical, Empirical and Remote Techniques

Guido Rodríguez <sup>1</sup>, Maurizio Mulas <sup>1,\*</sup>, Silvia Loaiza <sup>1</sup> and Michelle Del Pilar Villalta Echeverria <sup>1</sup>, Angel Amable Yanez Vinuesa <sup>2</sup>, Erwin Larreta <sup>1,3</sup> and Luis Jordá Bordehore <sup>4</sup>

<sup>1</sup> ESPOL Polytechnic University ESPOL, Faculty of Engineering in Earth Sciences FICT, Campus Gustavo Galindo Km 30.5 Vía Perimetral, P.O. Box 09-01-5863, Guayaquil 090101, Ecuador

<sup>2</sup> Municipal Autonomous Decentralized Government of Santa Cruz, Galapagos 200350, Ecuador

<sup>3</sup> Institute of Geological and Energetic Research (IIGE), Quito 170518, Ecuador

<sup>4</sup> Department of Engineering and Terrain Morphology, Polytechnic University of Madrid, 28040 Madrid, Spain

\* Correspondence: mmulas@espol.edu.ec

## Supplementary Materials

### *Virtual reality tour*

In order to analyze and share the information of the geomechanical stations, each one has been uploaded to a 3D objects in virtual repository:

<https://sketchfab.com/3d-models/sfm-galapagos-medium-1-46c822d142c249c4b8a1f3bc641c7671>

<https://sketchfab.com/3d-models/sfm-galapagos-medium-2-b984961e6ead47978a4b4e7ec73a5d3b>

<https://sketchfab.com/3d-models/sfm-galapagos-medium-3-59fec1f2090b4796b27ba9c2e81e24d4>

<https://sketchfab.com/3d-models/sfm-galapagos-medium-4-ef01be20fe8d423f90df30ee06e04f5c>

A virtual tour of the lava tube has been elaborated from the 3D point cloud:  
[https://youtu.be/naWTITo1\\_v0](https://youtu.be/naWTITo1_v0)
